# Supplementary material for: The Effectiveness of Wildlife Corridors in Facilitating Connectivity: Assessment of a Model System from the Australian Wet Tropics
Source: Springer Nature journal article supplement (doi:10.1186/s12889-015-2212-5), 2005-01-01
Supplement: MOESM2 [file 9750262]

**Additional Table 1.** Biomarkers of exposure in the Total Exposure Study.

| Biomarker[2]               | Component(s)                                                                    | Matrix      | Laboratory measurement technology                                    | Related to which Harmful and Potentially Harmful Constituents of Tobacco Smoke [55, 56] |
|----------------------------|---------------------------------------------------------------------------------|-------------|----------------------------------------------------------------------|-----------------------------------------------------------------------------------------|
| Particulate phase          |                                                                                 |             |                                                                      |                                                                                         |
| Nicotine Equivalents (NE)  | Nicotine, cotinine, trans-3'-hydroxycotinine and the corresponding glucuronides | 24 hr urine | Liquid chromatography-mass spectrometry/mass spectrometry (LC-MS/MS) | Nicotine or Nicotine (total) <sup>3</sup>                                               |
| Serum cotinine             | cotinine and trans-3'-hydroxycotinine [57]                                      | Serum       | Immunoassay                                                          | Nicotine or Nicotine (total) <sup>3</sup>                                               |
| Total NNAL                 | Total 4-(methylnitrosamino)-1-(3-pyridyl)-1-butanol, and its glucuronide        | 24 hr urine | LC-MS/MS                                                             | metabolite of NNK <sup>4</sup>                                                          |
| NNN <sup>1</sup>           | N-nitrosornicotine                                                              | 24 hr urine | LC-MS/MS                                                             | N-nitrosornicotine <sup>5</sup>                                                         |
| 4-ABP <sup>2</sup>         | 4-aminobiphenyl hemoglobin (Hb) adducts                                         | Blood       | Gas chromatography-mass spectrometry                                 | 4-aminobiphenyl (CA)                                                                    |
| Gas phase                  |                                                                                 |             |                                                                      |                                                                                         |
| 1-OHP <sup>2</sup>         | Total 1-hydroxypyrene                                                           | 24 hr urine | LC-MS/MS                                                             | polycyclic aromatic hydrocarbons <sup>5</sup>                                           |
| 3-HPMA <sup>2</sup>        | 3-hydroxy-propylmercapturic acid                                                | 24 hr urine | LC-MS/MS                                                             | metabolite of acrolein <sup>6</sup>                                                     |
| COHb <sup>2</sup>          | carboxyhemoglobin                                                               | Blood       | Spectrophotometry                                                    | Carbon monoxide <sup>7</sup> (RDT)                                                      |
| MHBMA <sup>2</sup>         | Monohydroxyl-butenylmercapturic acid                                            | 24 hr urine | LC-MS/MS                                                             | metabolite of 1,3 butadiene <sup>5</sup>                                                |
| DHMBA <sup>2</sup>         | Dihydroxy-butylmercapturic acid                                                 | 24 hr urine | LC-MS/MS                                                             | metabolite of 1,3 butadiene <sup>5</sup>                                                |
| S-PMA <sup>1,2</sup>       | S-phenylmercapturic acid                                                        | 24 hr urine | LC-MS/MS                                                             | metabolite of benzene <sup>8</sup>                                                      |
| Naphthalene <sup>1,2</sup> | aka 2-aminonaphthalene                                                          | 24 hr urine | LC-MS/MS                                                             | 2-aminonaphthalene <sup>5</sup>                                                         |
| 3-OH-B[a]P <sup>1,2</sup>  | 3-hydroxy-benzo[a]pyrene                                                        | 24 hr urine | LC-MS/MS                                                             | a metabolite of benzo[a]pyrene <sup>5</sup>                                             |
| o-Toluidine <sup>1,2</sup> | 3,3'-dimethylbenzidine                                                          | 24 hr urine | LC-MS/MS                                                             | o-Toluidine <sup>5</sup>                                                                |

<sup>1</sup>Not described by Roethig *et al* [2], but available in TES data. <sup>2</sup>Biomarker is not tobacco specific. <sup>3</sup>Reproductive or developmental toxicant, RDT, and addictive, AD. <sup>4</sup> Metabolite of NNK, 4-(methylnitrosamino)-1-(3-pyridyl)-1-butanone, a carcinogen, CA. <sup>5</sup>CA. <sup>6</sup>Respiratory toxicant, RT, and cardiovascular toxicant, CT. <sup>7</sup>RDT. <sup>8</sup>CA, CT, and RDT.
