# Supplementary material for: The Effectiveness of Wildlife Corridors in Facilitating Connectivity: Assessment of a Model System from the Australian Wet Tropics
Source: Springer Nature journal article supplement (doi:10.1186/s12889-015-2212-5), 2005-01-01
Supplement: MOESM3 [file 9750262]

**Additional Table 2.** Biomarkers of potential harm in the Total Exposure Study [3].

| Physiological Function | Biomarker (full name)                | Biomarker (acronym), if applicable | Detection Method and Matrix                       |
|------------------------|--------------------------------------|------------------------------------|---------------------------------------------------|
| Cardiovascular         | Heart Rate                           | HR                                 | After being seated for 5'                         |
| Cardiovascular         | Systolic Blood Pressure              | SBP                                | After being seated for 5'                         |
| Cardiovascular         | Diastolic Blood Pressure             | DBP                                | After being seated for 5'                         |
| Endothelial function   | von Willebrand factor                | vWF                                | Enzyme immunoassay (EIA), plasma                  |
| Endothelial function   | Microalbumin                         |                                    | Immunonephelometry, 24 hr urine                   |
| Platelet activation    | 11-Dehydrothromboxane-B <sub>2</sub> | 11-DHTB                            | EIA, 24 hr urine                                  |
| Hematologic            | Hemoglobin                           | Hb                                 | Bayer Advia 120 automated hematology (AH), blood  |
| Hematologic            | Hematocrit                           | Hct                                | AH, blood                                         |
| Hematologic            | Platelet count                       | Plts                               | AH, blood                                         |
| Inflammation           | White blood cell count               | WBC                                | AH, blood                                         |
| Inflammation           | High-sensitivity C-reactive protein  | hs-CRP                             | Immunonephelometry, serum                         |
| Inflammation           | Plasma fibrinogen                    |                                    | Photometry, plasma                                |
| Metabolism             | Uric acid                            | UA                                 | Roche Hitachi clinical analyzer (RH), 24 hr urine |
| Renal                  | Creatinine                           |                                    | RH, 24 hr urine                                   |
| Renal                  | Blood urea nitrogen                  | BUN                                | RH, 24 hr urine                                   |
| Lipid metabolism       | Total Cholesterol                    | Total C                            | RH, serum                                         |
| Lipid metabolism       | High-density lipoprotein cholesterol | HDL-cholesterol                    | RH, serum                                         |
| Lipid metabolism       | Low-density lipoprotein cholesterol  | LDL-cholesterol                    | RH, serum                                         |
| Lipid metabolism       | Triglycerides                        |                                    | RH, serum                                         |
| Hepatic                | Alanine aminotransferase             | ALT                                | RH, serum                                         |
| Hepatic                | Aspartate aminotransferase           | AST                                | RH, serum                                         |
| Hepatic                | Alkaline phosphatase                 | ALP                                | RH, serum                                         |
| Hepatic                | Lactate dehydrogenase                | LDH                                | RH, serum                                         |
| Hepatic                | Total bilirubin                      | TB                                 | RH, serum                                         |
| Hepatic                | Serum albumin                        | Alb                                | RH, serum                                         |
| Respiratory            | Forced expiratory volume in 1 second | FEV1                               | Spirometry                                        |
| Respiratory            | Forced expiratory vital capacity     | FVC                                | Spirometry                                        |
| Metabolism             | Glucose                              | Glucose                            | RH, serum                                         |
| Oxidative stress       | 8-epi-prostaglandin F <sub>2α</sub>  | 8-epi-PG F <sub>2α</sub>           | EIA, 24 hr urine                                  |
